# Supplementary material for: A collagen-AS/εPLL bilayered artificial substitute regulates anti-inflammation and infection for initial inflamed wound healing
Source: Royal Society of Chemistry journal article supplement (doi:10.1039/d1bm01071a), 2021-01-01
Supplement: d1bm01071a1.pdf [file d1bm01071a1.pdf]

## Supplementary figures

### **A collagen-AS/ $\epsilon$ PLL bilayered artificial substitute regulate anti-inflammation and infection for initial inflamed wound healing**

Gyeung Mi Seon,<sup>a</sup> Mi Hee Lee,<sup>a</sup> Min-Ah Koo,<sup>a,b</sup> Seung Hee Hong,<sup>a,b</sup> Ye jin Park,<sup>a</sup> Ha Kyeong Jeong,<sup>a</sup> and Jong-Chul Park<sup>\*a,b</sup>

---

<sup>a</sup> Cellbiocontrol Laboratory, Department of Medical Engineering, Yonsei University College of Medicine, Seoul 03722, Republic of Korea.

<sup>b</sup> Department of Medical Engineering, Graduate School of Medical Science, Brain Korea 21 Project, Yonsei University College of Medicine, Seoul 03722, Republic of Korea.

\* Correspondence Authors : E-mail: parkjc@yuhs.ac

## Supporting Figures

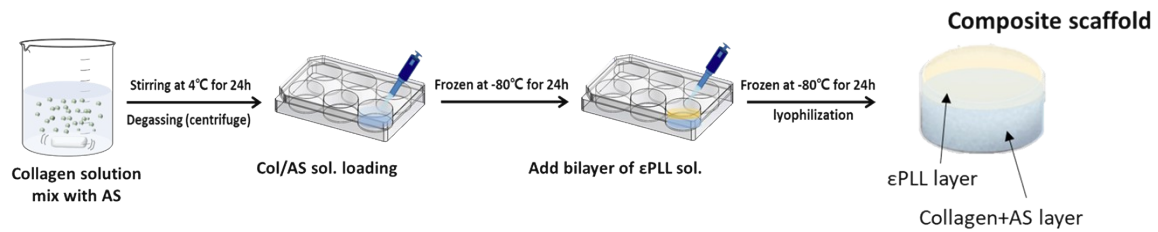

**Fig. S1.** Scheme of the preparation of bilayered composite scaffold. The three-step fabrication process includes: After homogenizing AS to the collagen solution, it loaded on the well plate. And after deep freezing then εPLL is loaded as a bilayer on the frozen collagen-AS. Lastly deep freezing followed by lyophilization to obtain a bilayered composite scaffold.

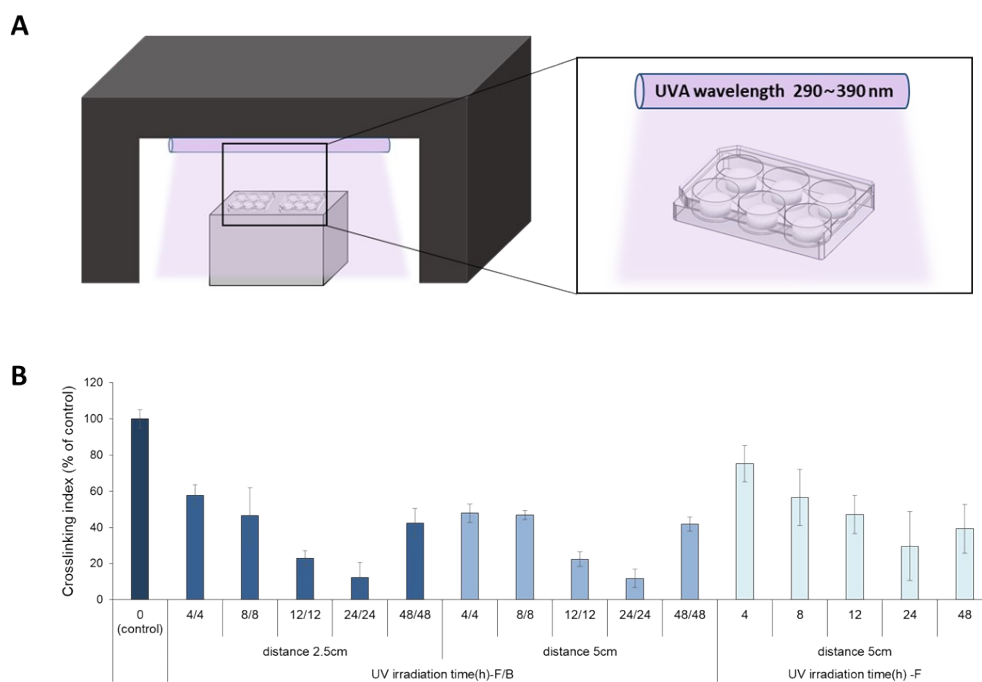

**Fig. S2.** The composite scaffold were subjected to UV irradiation below a halogen UV lamp (wavelength range 290–390 nm). (A) Scheme of the preparation of irradiation method on composite scaffold. The light intensity at this distance was determined as  $65\text{mW}/\text{cm}^2$  by a UV radiometer. (B) The graph of screening to determine the most effective irradiation value.

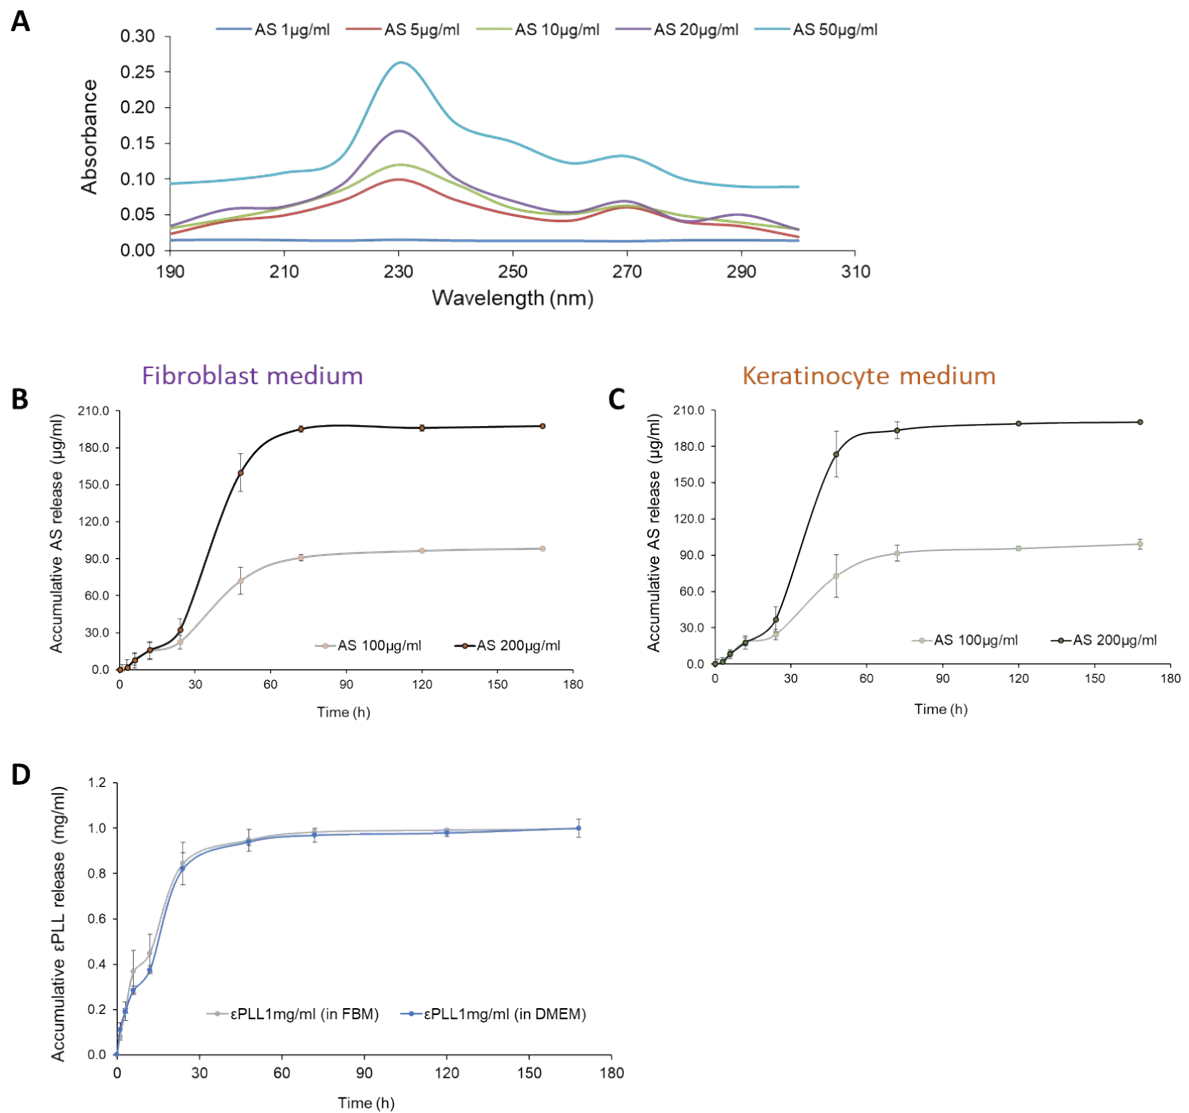

**Fig. S3.** *In vitro* accumulative release profile of asiaticoside from the Collagen-AS/ $\epsilon$ PLL composite scaffold. (A) Representative of wavelength screening in different concentration of AS were 1, 5, 10, 20 and 50  $\mu\text{g/ml}$ . A graph measured the amount of release accordingly to the AS concentration of 100 and 200  $\mu\text{g/ml}$  in (B) fibroblast medium (FBM) and (C) keratinocyte medium (DMEM). D) Accumulative  $\epsilon$ PLL release in FBM and DMEM medium. Error bars represents mean  $\pm$  standard deviation ( $n = 4$ ).

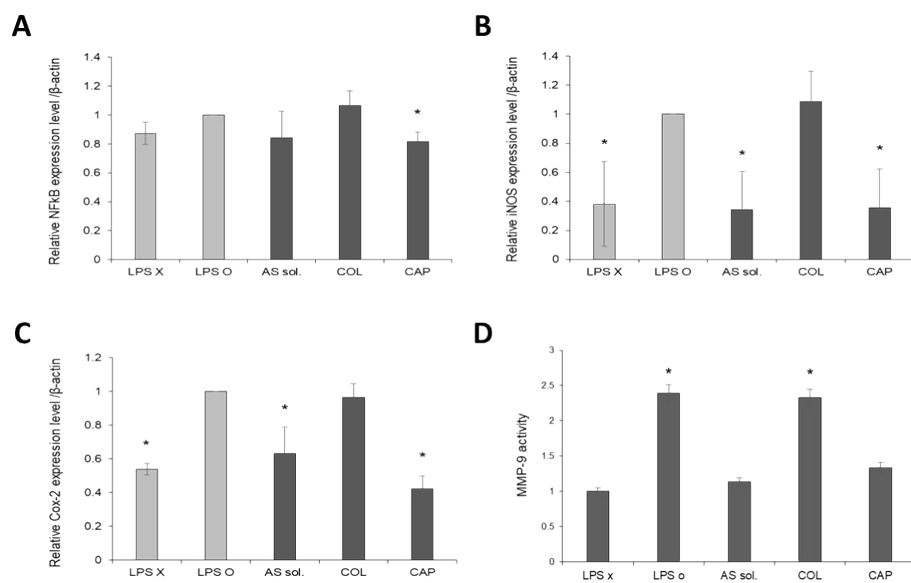

**Fig. S4.** The graphs indicated protein expression levels (westernblot) of (A) NF-kB, (B) iNOS, (C) Cox-2 and (D) MMP-9 in macrophage. The amount of protein level measured using Image J. Data are expressed as means  $\pm$  SD, \* $p < 0.05$  vs. only LPS treated cell (LPS o).

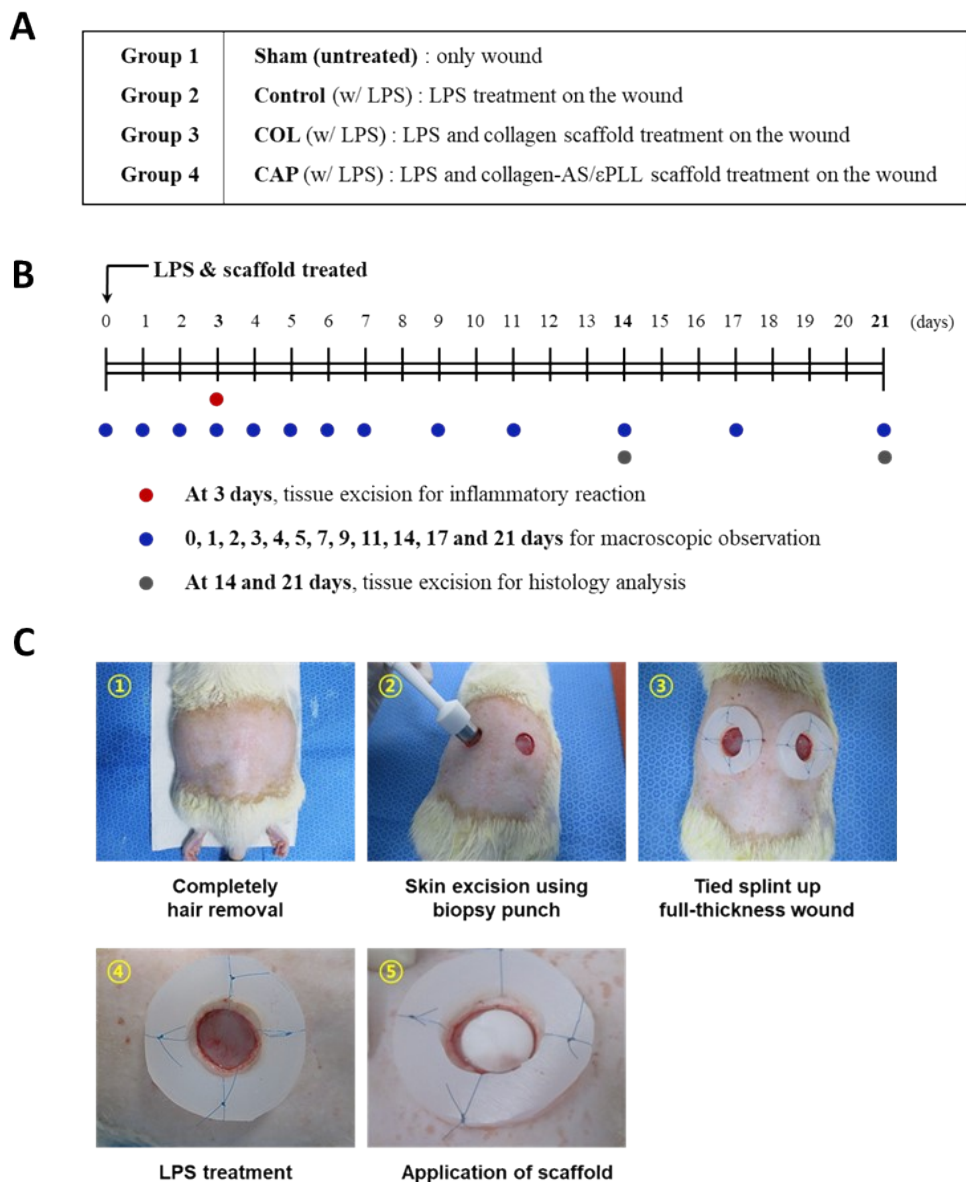

**Fig. S5.** (A) *in vivo* experimental groups and final study design: optimized inflamed full-thickness wound model. For *in vivo* study, healthy male SD rats were randomly assigned to experimental groups and they were divided into 4 groups untreated, sham with only wounds, Control group with LPS treatment, COL group is LPS with collagen scaffold treatment, and CAP

group is collagen with AS/ $\epsilon$ PLL scaffold treatment. (B) all groups were excision at day 3 to measure the initial inflammatory response and histological analysis. And from day 0 to 21, macroscopic observation to measure wound size and weights. Lastly confirmed wound healing effect on second and third weeks by isolated wound skin for histology analysis. (C) method of LPS induced inflammation dorsum wound model of SD rat.

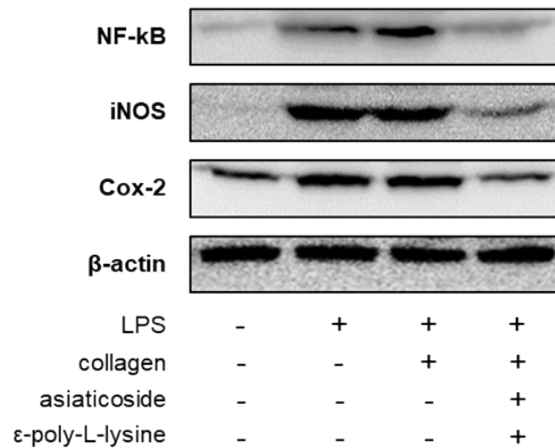

**Fig. S6.** *In vivo* inflammation test by quantification of inflammation related protein levels were examined (at 3 days) by western blot in skin wound section.
